# Supplementary material
Source: Springer Nature journal article supplement (https://www.springermedizin.de/resource/supplementary/12967_2010_741_MOESM4_ESM.pdf/9577422)

A

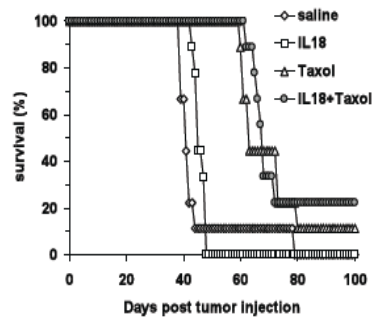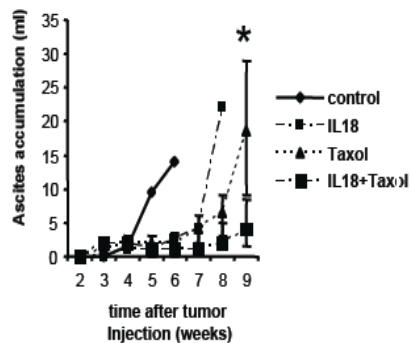

C

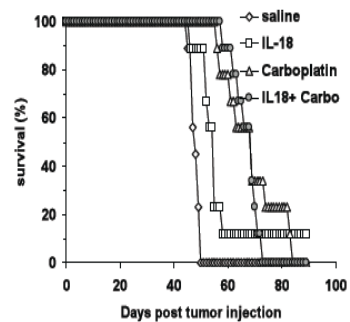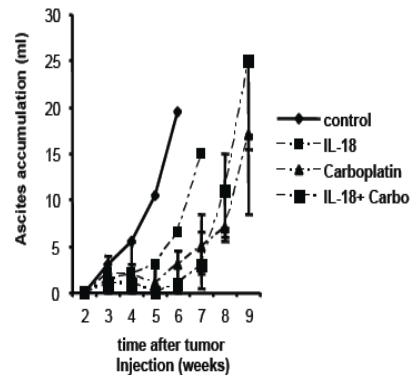

B

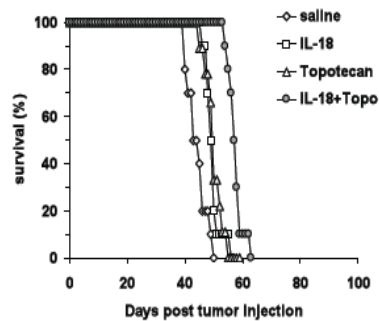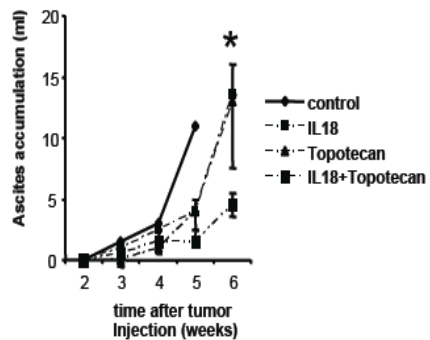

D

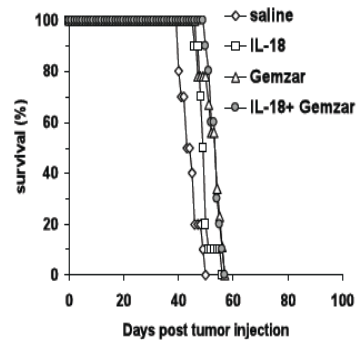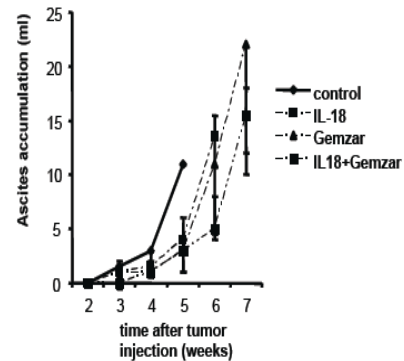

Supplement: MOESM4 [file 9577422]
